# Supplementary material
Source: publisher figshare collection journal article supplement (https://wiley.figshare.com/ndownloader/files/20151896)
Supplement: Supplementary file 1 [file 20151896]

## Sheet: DEET Tanks
Day	Date	Treatment	Tank #	Temp	NH3	pH	salinity	average (temp)	std dev (temp)	average (NH3)	std dev (NH3)	average (pH)	std dev (pH)	average (salinity)	std dev (salinity)			Temp	NH3	pH	salinity	average (temp)	std dev (temp)	average (NH3)	std dev (NH3)	average (pH)	std dev (pH)	average (salinity)	std dev (salinity)
-8	2017-07-14	DEET	1	22.3	0.5	7.69	15	21.208	0.680025	0.284375	0.188608	7.81185	0.0663926	17.75	1.251			22.3	0.5	7.69	15	21.1293	0.632193	0.234	0.168862	7.93716	0.154679	18.2923	1.09767
-7	2017-07-15	DEET	1	21	0.5	7.8	19											21	0.5	7.8	19	75		50		81		78		<- n
-6	2017-07-16	DEET	1	20.8		8.01	18.5	25		16		27		26		<- n		20.8		8.01	18.5
-5	2017-07-17	DEET	1	20.6	0.5	7.89	18											20.6	0.5	7.89	18							n total =	284
-4	2017-07-18	DEET	1	20.5		7.89	20.5											20.5		7.89	20.5
-3	2017-07-19	DEET	1	21.2	0.5	7.81	19											21.2	0.5	7.81	19
-2	2017-07-20	DEET	1	21	0.5	7.87	18											21	0.5	7.87	18
-1	2017-07-21	DEET	1	21.1	0.3	7.86	17											21.1	0.3	7.86	17
0	2017-07-22	DEET	1	22	0.5	7.89	16											22	0.5	7.89	16
1	2017-07-23	DEET	1	22	0.1	7.82	16.5											22	0.1	7.82	16.5
2	2017-07-24	DEET	1	21.8		7.83	18											21.8		7.83	18
3	2017-07-25	DEET	1	20.8	0.1	7.83	16											20.8	0.1	7.83	16
4	2017-07-26	DEET	1	20.6	0.1	7.84	16											20.6	0.1	7.84	16
5	2017-07-27	DEET	1	21.4		7.79	17.5											21.4		7.79	17.5
6	2017-07-28	DEET	1	21.6	0.25	7.8	***											21.6	0.25	7.8	***
7	2017-07-29	DEET	1	***		7.71	17.5											***		7.71	17.5
8	2017-07-30	DEET	1		0.25	7.79	17												0.25	7.79	17
9	2017-07-31	DEET	1	22.3		7.77	17											22.3		7.77	17
10	2017-08-01	DEET	1	21.1	0	7.74	18											21.1	0	7.74	18
11	2017-08-02	DEET	1	22.3		7.71	19											22.3		7.71	19
12	2017-08-03	DEET	1	21.3		7.75	18.5											21.3		7.75	18.5
13	2017-08-04	DEET	1	21.3	0.25	7.79	18											21.3	0.25	7.79	18
14	2017-08-05	DEET	1	21.3		7.79	19											21.3		7.79	19
15	2017-08-06	DEET	1	21.6	0.1	7.84	18											21.6	0.1	7.84	18
16	2017-08-07	DEET	1	20.4		7.79	18											20.4		7.79	18
17	2017-08-08	DEET	1	19.8	0.1	7.81	19.5											19.8	0.1	7.81	19.5
18	2017-08-09	DEET	1	20.1		7.81	17											20.1		7.81	17
Day	Date	Treatment	Tank #	Temp	NH3	pH	salinity	average (temp)	std dev (temp)	average (NH3)	std dev (NH3)	average (pH)	std dev (pH)	average (salinity)	std dev (salinity)			22.1	0.25	8.08	17
-8	2017-07-14	DEET	2	22.1	0.25	8.08	17	21.028	0.634114	0.205882	0.152973	7.97519	0.139239	18.5192	0.888603			21.1	0.25	8.27	19
-7	2017-07-15	DEET	2	21.1	0.25	8.27	19											20.7		8.28	19
-6	2017-07-16	DEET	2	20.7		8.28	19	25		17		27		26		<- n		20.5	0.25	8.04	19.5
-5	2017-07-17	DEET	2	20.5	0.25	8.04	19.5											20.5		8.24	19
-4	2017-07-18	DEET	2	20.5		8.24	19											20.8	0.25	7.93	18
-3	2017-07-19	DEET	2	20.8	0.25	7.93	18											21.4	0.5	8.11	18.5
-2	2017-07-20	DEET	2	21.4	0.5	8.11	18.5											21.2	0.4	8.07	17.5
-1	2017-07-21	DEET	2	21.2	0.4	8.07	17.5											21.9	0.5	7.97	18
0	2017-07-22	DEET	2	21.9	0.5	7.97	18											21.7	0.1	7.84	18.5
1	2017-07-23	DEET	2	21.7	0.1	7.84	18.5											21.6		7.91	18
2	2017-07-24	DEET	2	21.6		7.91	18											20.7	0.1	7.89	19
3	2017-07-25	DEET	2	20.7	0.1	7.89	19											21.2	0.1	7.83	19
4	2017-07-26	DEET	2	21.2	0.1	7.83	19											21.3		7.78	16
5	2017-07-27	DEET	2	21.3		7.78	16											21	0.25	7.86	***
6	2017-07-28	DEET	2	21	0.25	7.86	***													7.74	18
7	2017-07-29	DEET	2			7.74	18												0.25	7.85	17.5
8	2017-07-30	DEET	2		0.25	7.85	17.5											21.6		7.87	18
9	2017-07-31	DEET	2	21.6		7.87	18											20.8	0	7.87	19
10	2017-08-01	DEET	2	20.8	0	7.87	19											22.3	0	7.94	18.5
11	2017-08-02	DEET	2	22.3	0	7.94	18.5											20.5		8.04	18.5
12	2017-08-03	DEET	2	20.5		8.04	18.5											20.5	0.1	8.01	18.5
13	2017-08-04	DEET	2	20.5	0.1	8.01	18.5											21		8.05	19.5
14	2017-08-05	DEET	2	21		8.05	19.5											21.3	0.1	7.99	19.5
15	2017-08-06	DEET	2	21.3	0.1	7.99	19.5											20.1		7.95	19.5
16	2017-08-07	DEET	2	20.1		7.95	19.5											19.8	0.1	7.98	20
17	2017-08-08	DEET	2	19.8	0.1	7.98	20											20.1		7.94	19
18	2017-08-09	DEET	2	20.1		7.94	19											21.9	0.25	8.04	15.5
Day	Date	Treatment	Tank #	Temp	NH3	pH	salinity	average (temp)	std dev (temp)	average (NH3)	std dev (NH3)	average (pH)	std dev (pH)	average (salinity)	std dev (salinity)			21.5	0.25	8.29	19.5
-8	2017-07-14	DEET	3	21.9	0.25	8.04	15.5	21.152	0.591692	0.214706	0.163712	8.02444	0.15525	18.6077	0.945272			20.6		8.4	19.5
-7	2017-07-15	DEET	3	21.5	0.25	8.29	19.5											20.1	0.5	8.12	18.5
-6	2017-07-16	DEET	3	20.6		8.4	19.5	25		17		27		26		<- n		20.9		8.36	19
-5	2017-07-17	DEET	3	20.1	0.5	8.12	18.5											21	0.25	8.06	19
-4	2017-07-18	DEET	3	20.9		8.36	19											21.1	0.5	8.16	18.5
-3	2017-07-19	DEET	3	21	0.25	8.06	19											21	0.3	8.25	17.5
-2	2017-07-20	DEET	3	21.1	0.5	8.16	18.5											21.8	0.5	8.06	18
-1	2017-07-21	DEET	3	21	0.3	8.25	17.5											22.3	0.1	7.96	18
0	2017-07-22	DEET	3	21.8	0.5	8.06	18											21.6		8.06	18.5
1	2017-07-23	DEET	3	22.3	0.1	7.96	18											20.8	0.1	8.01	19
2	2017-07-24	DEET	3	21.6		8.06	18.5											21.1	0.1	7.96	18
3	2017-07-25	DEET	3	20.8	0.1	8.01	19											21.5		7.96	20
4	2017-07-26	DEET	3	21.1	0.1	7.96	18											21.5	0.25	7.97	***
5	2017-07-27	DEET	3	21.5		7.96	20													7.9	19.3
6	2017-07-28	DEET	3	21.5	0.25	7.97	***												0.25	8	18
7	2017-07-29	DEET	3			7.9	19.3											21.7		8.01	19
8	2017-07-30	DEET	3		0.25	8	18											21.1	0	8.07	20
9	2017-07-31	DEET	3	21.7		8.01	19											21.8	0	7.84	20
10	2017-08-01	DEET	3	21.1	0	8.07	20											20.8		7.91	19
11	2017-08-02	DEET	3	21.8	0	7.84	20											21	0.1	7.88	18.5
12	2017-08-03	DEET	3	20.8		7.91	19											21.5		7.95	18
13	2017-08-04	DEET	3	21	0.1	7.88	18.5											21.5	0.1	7.91	18.5
14	2017-08-05	DEET	3	21.5		7.95	18											20.6		7.83	18
15	2017-08-06	DEET	3	21.5	0.1	7.91	18.5											19.9	0.1	7.87	18
16	2017-08-07	DEET	3	20.6		7.83	18											20.2		7.83	19
17	2017-08-08	DEET	3	19.9	0.1	7.87	18
18	2017-08-09	DEET	3	20.2		7.83	19

## Sheet: Mixture Tanks
Day	Date	Treatment	Tank #	Temp	NH3	pH	salinity	average (temp)	std dev (temp)	average (NH3)	std dev (NH3)	average (pH)	std dev (pH)	average (salinity)	std dev (salinity)			Temp	NH3	pH	salinity	average (temp)	std dev (temp)	average (NH3)	std dev (NH3)	average (pH)	std dev (pH)	average (salinity)	std dev (salinity)
-8	2017-07-14	Mixture	1	22.3	0.25	7.69	16	21.424	0.6146	0.2	0.146842	7.79259	0.0587428	18.1731	0.70629			22.3	0.25	7.69	16	21.2689	0.605664	0.185294	0.132399	7.9284	0.1801	18.3397	0.941447
-7	2017-07-15	Mixture	1	21.5	0.25	7.85	19.5											21.5	0.25	7.85	19.5	74		51		81		78		<- n
-6	2017-07-16	Mixture	1	21.2		7.94	19	25		17		27		26		<- n		21.2		7.94	19
-5	2017-07-17	Mixture	1	20.9	0.25	7.88	19											20.9	0.25	7.88	19							n total =	284
-4	2017-07-18	Mixture	1	20.9		7.8	19											20.9		7.8	19
-3	2017-07-19	Mixture	1	21.5	0.25	7.75	18.5											21.5	0.25	7.75	18.5
-2	2017-07-20	Mixture	1	21.1	0.5	7.87	18.5											21.1	0.5	7.87	18.5
-1	2017-07-21	Mixture	1	21.5	0.3	7.83	18											21.5	0.3	7.83	18
0	2017-07-22	Mixture	1	22.1	0.5	7.83	18											22.1	0.5	7.83	18
1	2017-07-23	Mixture	1	22.4	0.1	7.77	17.5											22.4	0.1	7.77	17.5
2	2017-07-24	Mixture	1	22.1		7.76	18.5											22.1		7.76	18.5
3	2017-07-25	Mixture	1	20.9	0.1	7.75	18											20.9	0.1	7.75	18
4	2017-07-26	Mixture	1	20.6	0.1	7.76	18											20.6	0.1	7.76	18
5	2017-07-27	Mixture	1	21.9		7.75	18.5											21.9		7.75	18.5
6	2017-07-28	Mixture	1	21.6	0.1	7.78	***											21.6	0.1	7.78	***
7	2017-07-29	Mixture	1			7.72	19													7.72	19
8	2017-07-30	Mixture	1		0.25	7.73	17.5												0.25	7.73	17.5
9	2017-07-31	Mixture	1	22.2		7.7	18											22.2		7.7	18
10	2017-08-01	Mixture	1	21.2	0	7.79	18											21.2	0	7.79	18
11	2017-08-02	Mixture	1	22.4	0	7.75	19											22.4	0	7.75	19
12	2017-08-03	Mixture	1	21.3		7.79	18											21.3		7.79	18
13	2017-08-04	Mixture	1	21.3	0.25	7.77	18											21.3	0.25	7.77	18
14	2017-08-05	Mixture	1	21.6		7.81	17.5											21.6		7.81	17.5
15	2017-08-06	Mixture	1	21.7	0.1	7.87	18											21.7	0.1	7.87	18
16	2017-08-07	Mixture	1	20.5		7.8	18											20.5		7.8	18
17	2017-08-08	Mixture	1	20.4	0.1	7.82	18											20.4	0.1	7.82	18
18	2017-08-09	Mixture	1	20.5		7.84	17.5											20.5		7.84	17.5
Day	Date	Treatment	Tank #	Temp	NH3	pH	salinity	average (temp)	std dev (temp)	average (NH3)	std dev (NH3)	average (pH)	std dev (pH)	average (salinity)	std dev (salinity)			22.1	0.25	8.06	16
-8	2017-07-14	Mixture	2	22.1	0.25	8.06	16	21.376	0.598804	0.164706	0.10272	7.95333	0.109825	18.2885	1.24236			22	0.25	8.1	20
-7	2017-07-15	Mixture	2	22	0.25	8.1	20											21		8.22	20
-6	2017-07-16	Mixture	2	21		8.22	20	25		17		27		26		<- n		20.8	0.25	8.11	19.5
-5	2017-07-17	Mixture	2	20.8	0.25	8.11	19.5											20.9		8.17	18.5
-4	2017-07-18	Mixture	2	20.9		8.17	18.5											21.2	0.25	7.98	18
-3	2017-07-19	Mixture	2	21.2	0.25	7.98	18											21.1	0.25	8	18.5
-2	2017-07-20	Mixture	2	21.1	0.25	8	18.5											21.1	0.25	8.05	16
-1	2017-07-21	Mixture	2	21.1	0.25	8.05	16											22.1	0.35	8.01	15
0	2017-07-22	Mixture	2	22.1	0.35	8.01	15											22.1	0.1	7.92	18
1	2017-07-23	Mixture	2	22.1	0.1	7.92	18											21.7		7.93	18
2	2017-07-24	Mixture	2	21.7		7.93	18											20.9	0.1	7.93	18.5
3	2017-07-25	Mixture	2	20.9	0.1	7.93	18.5											20.9	0.1	7.94	18.5
4	2017-07-26	Mixture	2	20.9	0.1	7.94	18.5											21.9		7.96	19
5	2017-07-27	Mixture	2	21.9		7.96	19											21.3	0.1	7.91	***
6	2017-07-28	Mixture	2	21.3	0.1	7.91	***													7.85	18
7	2017-07-29	Mixture	2			7.85	18												0.25	7.86	17
8	2017-07-30	Mixture	2		0.25	7.86	17											21.8		7.95	17
9	2017-07-31	Mixture	2	21.8		7.95	17											21.1	0	8	18
10	2017-08-01	Mixture	2	21.1	0	8	18											22.8	0	7.82	19.5
11	2017-08-02	Mixture	2	22.8	0	7.82	19.5											21.3		7.83	19.5
12	2017-08-03	Mixture	2	21.3		7.83	19.5											21.2	0.1	7.84	19
13	2017-08-04	Mixture	2	21.2	0.1	7.84	19											21.5		7.87	19
14	2017-08-05	Mixture	2	21.5		7.87	19											21.9	0.1	7.86	18.5
15	2017-08-06	Mixture	2	21.9	0.1	7.86	18.5											20.9		7.8	18.5
16	2017-08-07	Mixture	2	20.9		7.8	18.5											20.1	0.1	7.85	19.5
17	2017-08-08	Mixture	2	20.1	0.1	7.85	19.5											20.7		7.92	18.5
18	2017-08-09	Mixture	2	20.7		7.92	18.5											21.5	0.25	8.17	16
Day	Date	Treatment	Tank #	Temp	NH3	pH	salinity	average (temp)	std dev (temp)	average (NH3)	std dev (NH3)	average (pH)	std dev (pH)	average (salinity)	std dev (salinity)			21.1	0.25	8.47	18.5
-8	2017-07-14	Mixture	3	21.5	0.25	8.17	16	20.9958	0.528722	0.191176	0.14815	8.03926	0.227443	18.5577	0.778806			20.6		8.51	18.5
-7	2017-07-15	Mixture	3	21.1	0.25	8.47	18.5											20.4	0.25	8.17	18.5
-6	2017-07-16	Mixture	3	20.6		8.51	18.5	24		17		27		26		<- n		20.5		8.55	19
-5	2017-07-17	Mixture	3	20.4	0.25	8.17	18.5											20.7	0.25	8.15	19.5
-4	2017-07-18	Mixture	3	20.5		8.55	19											21	0.5	8.3	19.5
-3	2017-07-19	Mixture	3	20.7	0.25	8.15	19.5											20.9	0.3	8.37	18.5
-2	2017-07-20	Mixture	3	21	0.5	8.3	19.5											21.7	0.5	8.11	18.5
-1	2017-07-21	Mixture	3	20.9	0.3	8.37	18.5											22.1	0.1	8.05	18.5
0	2017-07-22	Mixture	3	21.7	0.5	8.11	18.5											21.6		8.09	18.5
1	2017-07-23	Mixture	3	22.1	0.1	8.05	18.5											21.1	0.1	7.94	19
2	2017-07-24	Mixture	3	21.6		8.09	18.5											20.8	0.1	7.9	19
3	2017-07-25	Mixture	3	21.1	0.1	7.94	19											20.3		7.93	19
4	2017-07-26	Mixture	3	20.8	0.1	7.9	19												0.1	7.87	***
5	2017-07-27	Mixture	3	20.3		7.93	19													7.89	18
6	2017-07-28	Mixture	3		0.1	7.87	***												0.25	7.98	19
7	2017-07-29	Mixture	3			7.89	18											21.5		7.89	18
8	2017-07-30	Mixture	3		0.25	7.98	19											21.1	0	7.92	18
9	2017-07-31	Mixture	3	21.5		7.89	18											21.3	0	7.78	18
10	2017-08-01	Mixture	3	21.1	0	7.92	18											20.7		7.84	17.5
11	2017-08-02	Mixture	3	21.3	0	7.78	18											21	0.1	7.87	18
12	2017-08-03	Mixture	3	20.7		7.84	17.5											21.2		7.93	19
13	2017-08-04	Mixture	3	21	0.1	7.87	18											21.8	0.1	7.92	18.5
14	2017-08-05	Mixture	3	21.2		7.93	19											20.7		7.78	19.5
15	2017-08-06	Mixture	3	21.8	0.1	7.92	18.5											20	0.1	7.89	20
16	2017-08-07	Mixture	3	20.7		7.78	19.5											20.3		7.79	18.5
17	2017-08-08	Mixture	3	20	0.1	7.89	20
18	2017-08-09	Mixture	3	20.3		7.79	18.5

## Sheet: Fluoxetine Tanks
Day	Date	Treatment	Tank #	Temp	NH3	pH	salinity	average (temp)	std dev (temp)	average (NH3)	std dev (NH3)	average (pH)	std dev (pH)	average (salinity)	std dev (salinity)					Temp	NH3	pH	salinity	average (temp)	std dev (temp)	average (NH3)	std dev (NH3)	average (pH)	std dev (pH)	average (salinity)	std dev (salinity)
-8	2017-07-14	Fluoxetine	1	22.5	0.25	7.93	16	21.496	0.595455	0.194444	0.170543	7.96741	0.0663089	18.8654	1.9003					22.5	0.25	7.93	16	21.4387	0.590898	0.199038	0.16194	7.90235	0.126721	18.5064	1.47818
-7	2017-07-15	Fluoxetine	1	21.5	0.25	8.05	19													21.5	0.25	8.05	19	75		52		81		78		<- n
-6	2017-07-16	Fluoxetine	1	21.5		8.17	19	25		18		27		26		<- n				21.5		8.17	19
-5	2017-07-17	Fluoxetine	1	21.2	0.25	8.04	19													21.2	0.25	8.04	19							n total =	286
-4	2017-07-18	Fluoxetine	1	20.8		8.05	17													20.8		8.05	17
-3	2017-07-19	Fluoxetine	1	21.5	0.25	7.92	17													21.5	0.25	7.92	17
-2	2017-07-20	Fluoxetine	1	21.2	0.5	7.99	18													21.2	0.5	7.99	18
-1	2017-07-21	Fluoxetine	1	21.5	0.5	8	17													21.5	0.5	8	17
0	2017-07-22	Fluoxetine	1	22.3	0.5	8	18													22.3	0.5	8	18
1	2017-07-23	Fluoxetine	1	22.5	0.1	7.88	18													22.5	0.1	7.88	18
2	2017-07-24	Fluoxetine	1	22		7.91	18													22		7.91	18
3	2017-07-25	Fluoxetine	1	21	0.1	7.92	20													21	0.1	7.92	20
4	2017-07-26	Fluoxetine	1	20.8	0.1	7.94	19													20.8	0.1	7.94	19
5	2017-07-27	Fluoxetine	1	22	0	7.99	19													22	0	7.99	19
6	2017-07-28	Fluoxetine	1	22	0.25	7.91	***													22	0.25	7.91	***
7	2017-07-29	Fluoxetine	1			7.9	17															7.9	17
8	2017-07-30	Fluoxetine	1		0.25	8	17.5														0.25	8	17.5
9	2017-07-31	Fluoxetine	1	21.8		8.02	17.5													21.8		8.02	17.5
10	2017-08-01	Fluoxetine	1	21.5	0	7.98	20													21.5	0	7.98	20
11	2017-08-02	Fluoxetine	1	22.2	0	7.85	20													22.2	0	7.85	20
12	2017-08-03	Fluoxetine	1	21.4		7.95	19													21.4		7.95	19
13	2017-08-04	Fluoxetine	1	21.4	0	7.97	18.5													21.4	0	7.97	18.5
14	2017-08-05	Fluoxetine	1	21.6		7.99	25													21.6		7.99	25
15	2017-08-06	Fluoxetine	1	21.7	0.1	7.99	23													21.7	0.1	7.99	23
16	2017-08-07	Fluoxetine	1	20.6		7.93	20													20.6		7.93	20
17	2017-08-08	Fluoxetine	1	20.3	0.1	7.94	20													20.3	0.1	7.94	20
18	2017-08-09	Fluoxetine	1	20.6		7.9	19													20.6		7.9	19
Day	Date	Treatment	Tank #	Temp	NH3	pH	salinity	average (temp)	std dev (temp)	average (NH3)	std dev (NH3)	average (pH)	std dev (pH)	average (salinity)	std dev (salinity)					22.4	0.25	7.99	15.5
-8	2017-07-14	Fluoxetine	2	22.4	0.25	7.99	15.5	21.368	0.57859	0.182353	0.135717	7.86074	0.107843	18.5962	1.28856					21.7	0.25	8.03	19.5
-7	2017-07-15	Fluoxetine	2	21.7	0.25	8.03	19.5													21.1		8.13	19
-6	2017-07-16	Fluoxetine	2	21.1		8.13	19	25		17		27		26		<- n				20.8	0.25	7.93	18.5
-5	2017-07-17	Fluoxetine	2	20.8	0.25	7.93	18.5													21		8.01	18.5
-4	2017-07-18	Fluoxetine	2	21		8.01	18.5													21.1	0.5	7.84	19
-3	2017-07-19	Fluoxetine	2	21.1	0.5	7.84	19													21.4	0.25	7.9	19.5
-2	2017-07-20	Fluoxetine	2	21.4	0.25	7.9	19.5													21.3	0.25	7.93	18
-1	2017-07-21	Fluoxetine	2	21.3	0.25	7.93	18													22.2	0.35	7.87	18
0	2017-07-22	Fluoxetine	2	22.2	0.35	7.87	18													22.5	0.1	7.8	18
1	2017-07-23	Fluoxetine	2	22.5	0.1	7.8	18													21.8		7.83	19
2	2017-07-24	Fluoxetine	2	21.8		7.83	19													21.2	0.1	7.85	19
3	2017-07-25	Fluoxetine	2	21.2	0.1	7.85	19													21.1	0.1	7.81	17
4	2017-07-26	Fluoxetine	2	21.1	0.1	7.81	17													22		7.74	18
5	2017-07-27	Fluoxetine	2	22		7.74	18													21.7	0.25	7.74	***
6	2017-07-28	Fluoxetine	2	21.7	0.25	7.74	***															7.61	18
7	2017-07-29	Fluoxetine	2			7.61	18														0.25	7.81	17
8	2017-07-30	Fluoxetine	2		0.25	7.81	17													21.5		7.81	16.5
9	2017-07-31	Fluoxetine	2	21.5		7.81	16.5													21	0	7.86	20
10	2017-08-01	Fluoxetine	2	21	0	7.86	20													21.4	0	7.68	18
11	2017-08-02	Fluoxetine	2	21.4	0	7.68	18													20.8		7.92	19
12	2017-08-03	Fluoxetine	2	20.8		7.92	19													21.1	0	7.9	18
13	2017-08-04	Fluoxetine	2	21.1	0	7.9	18													21.5		7.91	21
14	2017-08-05	Fluoxetine	2	21.5		7.91	21													22	0.1	7.84	21
15	2017-08-06	Fluoxetine	2	22	0.1	7.84	21													20.8		7.79	20
16	2017-08-07	Fluoxetine	2	20.8		7.79	20													20	0.1	7.87	20
17	2017-08-08	Fluoxetine	2	20	0.1	7.87	20													20.8		7.84	18.5
18	2017-08-09	Fluoxetine	2	20.8		7.84	18.5													22.4	0.25	7.88	15
Day	Date	Treatment	Tank #	Temp	NH3	pH	salinity	average (temp)	std dev (temp)	average (NH3)	std dev (NH3)	average (pH)	std dev (pH)	average (salinity)	std dev (salinity)					21.4	0.25	8.03	18
-8	2017-07-14	Fluoxetine	3	22.4	0.25	7.88	15	21.452	0.615169	0.220588	0.182909	7.87889	0.16315	18.0577	1.05192					21.1		7.17	17.5
-7	2017-07-15	Fluoxetine	3	21.4	0.25	8.03	18													20.8	0.25	7.99	18
-6	2017-07-16	Fluoxetine	3	21.1		7.17	17.5	25		17		27		26		<- n				21		8.04	17.5
-5	2017-07-17	Fluoxetine	3	20.8	0.25	7.99	18													21.3	0.5	7.84	17
-4	2017-07-18	Fluoxetine	3	21		8.04	17.5													21.5	0.5	7.95	18
-3	2017-07-19	Fluoxetine	3	21.3	0.5	7.84	17													21.3	0.5	7.95	18
-2	2017-07-20	Fluoxetine	3	21.5	0.5	7.95	18													22.5	0.5	7.89	18
-1	2017-07-21	Fluoxetine	3	21.3	0.5	7.95	18													22.5	0.1	7.83	19
0	2017-07-22	Fluoxetine	3	22.5	0.5	7.89	18													22.3		7.9	19
1	2017-07-23	Fluoxetine	3	22.5	0.1	7.83	19													21.3	0.1	7.92	19
2	2017-07-24	Fluoxetine	3	22.3		7.9	19													21.1	0.1	7.89	18.5
3	2017-07-25	Fluoxetine	3	21.3	0.1	7.92	19													22		7.87	18
4	2017-07-26	Fluoxetine	3	21.1	0.1	7.89	18.5													21.8	0.25	7.85	***
5	2017-07-27	Fluoxetine	3	22		7.87	18															7.72	17.5
6	2017-07-28	Fluoxetine	3	21.8	0.25	7.85	***														0.25	7.87	17.5
7	2017-07-29	Fluoxetine	3			7.72	17.5													21.8		7.85	17
8	2017-07-30	Fluoxetine	3		0.25	7.87	17.5													21.3	0	7.91	19
9	2017-07-31	Fluoxetine	3	21.8		7.85	17													21.6	0	7.69	20
10	2017-08-01	Fluoxetine	3	21.3	0	7.91	19													20.9		7.95	19.5
11	2017-08-02	Fluoxetine	3	21.6	0	7.69	20													21.3	0	7.98	19
12	2017-08-03	Fluoxetine	3	20.9		7.95	19.5													21.5		8.02	18
13	2017-08-04	Fluoxetine	3	21.3	0	7.98	19													22.1	0.1	7.93	19.5
14	2017-08-05	Fluoxetine	3	21.5		8.02	18													20.8		7.92	18
15	2017-08-06	Fluoxetine	3	22.1	0.1	7.93	19.5													20.1	0.1	7.95	17
16	2017-08-07	Fluoxetine	3	20.8		7.92	18													20.6		7.94	17
17	2017-08-08	Fluoxetine	3	20.1	0.1	7.95	17
18	2017-08-09	Fluoxetine	3	20.6		7.94	17

## Sheet: Diphen Tanks
Day	Date	Treatment	Tank #	Temp	NH3	pH	salinity	average (temp)	std dev (temp)	average (NH3)	std dev (NH3)	average (pH)	std dev (pH)	average (salinity)	std dev (salinity)		Temp	NH3	pH	salinity	average (temp)	std dev (temp)	average (NH3)	std dev (NH3)	average (pH)	std dev (pH)	average (salinity)	std dev (salinity)
-8	2017-07-14	Diphenhydramine	1	22.6	0.25	7.94	15.5	21.476	0.615278	0.214706	0.163712	7.87444	0.0845046	18.2885	0.907448		22.6	0.25	7.94	15.5	21.3827	0.616304	0.19902	0.146796	7.96049	0.160623	18.3013	1.44451
-7	2017-07-15	Diphenhydramine	1	21.5	0.25	7.99	18										21.5	0.25	7.99	18	75		51		81		78		<- n
-6	2017-07-16	Diphenhydramine	1	21.1		8.08	18	25		17		27		26		<- n	21.1		8.08	18
-5	2017-07-17	Diphenhydramine	1	21.1	0.5	7.93	18										21.1	0.5	7.93	18							n total =	285
-4	2017-07-18	Diphenhydramine	1	21.1		7.98	18										21.1		7.98	18
-3	2017-07-19	Diphenhydramine	1	21.5	0.25	7.86	18										21.5	0.25	7.86	18	max
-2	2017-07-20	Diphenhydramine	1	21.2	0.5	7.95	19										21.2	0.5	7.95	19	23.6
-1	2017-07-21	Diphenhydramine	1	21.5	0.3	7.97	18										21.5	0.3	7.97	18	mix
0	2017-07-22	Diphenhydramine	1	22.4	0.5	7.96	18										22.4	0.5	7.96	18	20.1
1	2017-07-23	Diphenhydramine	1	22	0.1	7.84	18										22	0.1	7.84	18
2	2017-07-24	Diphenhydramine	1	22		7.87	18										22		7.87	18
3	2017-07-25	Diphenhydramine	1	21	0.1	7.87	19										21	0.1	7.87	19
4	2017-07-26	Diphenhydramine	1	20.8	0.1	7.91	18										20.8	0.1	7.91	18
5	2017-07-27	Diphenhydramine	1	22.1		7.87	18.5										22.1		7.87	18.5
6	2017-07-28	Diphenhydramine	1	21.9	0.25	7.85	***										21.9	0.25	7.85	***
7	2017-07-29	Diphenhydramine	1			7.68	18.5												7.68	18.5
8	2017-07-30	Diphenhydramine	1		0.25	7.88	18											0.25	7.88	18
9	2017-07-31	Diphenhydramine	1	21.9		7.82	17.5										21.9		7.82	17.5
10	2017-08-01	Diphenhydramine	1	21.3	0	7.85	18										21.3	0	7.85	18
11	2017-08-02	Diphenhydramine	1	22.5	0	7.75	18										22.5	0	7.75	18
12	2017-08-03	Diphenhydramine	1	21.2		7.84	20										21.2		7.84	20
13	2017-08-04	Diphenhydramine	1	21.5	0.1	7.85	19										21.5	0.1	7.85	19
14	2017-08-05	Diphenhydramine	1	21.7		7.88	18.5										21.7		7.88	18.5
15	2017-08-06	Diphenhydramine	1	21.6	0.1	7.85	20										21.6	0.1	7.85	20
16	2017-08-07	Diphenhydramine	1	20.7		7.78	20										20.7		7.78	20
17	2017-08-08	Diphenhydramine	1	20.1	0.1	7.78	18.5										20.1	0.1	7.78	18.5
18	2017-08-09	Diphenhydramine	1	20.6		7.78	17.5										20.6		7.78	17.5
Day	Date	Treatment	Tank #	Temp	NH3	pH	salinity	average (temp)	std dev (temp)	average (NH3)	std dev (NH3)	average (pH)	std dev (pH)	average (salinity)	std dev (salinity)		21.9	0.25	8.08	17
-8	2017-07-14	Diphenhydramine	2	21.9	0.25	8.08	17	21.34	0.556028	0.167647	0.110314	7.9663	0.184352	18.2115	2.07448		21.5	0.25	8.34	19
-7	2017-07-15	Diphenhydramine	2	21.5	0.25	8.34	19										20.8		8.37	18
-6	2017-07-16	Diphenhydramine	2	20.8		8.37	18	25		17		27		26		<- n	20.6	0.25	8.08	18.5
-5	2017-07-17	Diphenhydramine	2	20.6	0.25	8.08	18.5										20.9		8.38	19.5
-4	2017-07-18	Diphenhydramine	2	20.9		8.38	19.5										21.2	0.25	8.02	19.5
-3	2017-07-19	Diphenhydramine	2	21.2	0.25	8.02	19.5										21.5	0.25	8.16	18.5
-2	2017-07-20	Diphenhydramine	2	21.5	0.25	8.16	18.5										21.2	0.25	8.19	17.5
-1	2017-07-21	Diphenhydramine	2	21.2	0.25	8.19	17.5										22	0.35	8.03	19
0	2017-07-22	Diphenhydramine	2	22	0.35	8.03	19										22.3	0.1	7.93	18
1	2017-07-23	Diphenhydramine	2	22.3	0.1	7.93	18										22		8	19.5
2	2017-07-24	Diphenhydramine	2	22		8	19.5										21.1	0.1	7.91	19
3	2017-07-25	Diphenhydramine	2	21.1	0.1	7.91	19										21.3	0.1	7.89	18.5
4	2017-07-26	Diphenhydramine	2	21.3	0.1	7.89	18.5										21.5		7.88	17
5	2017-07-27	Diphenhydramine	2	21.5		7.88	17										21.5	0.25	7.88	***
6	2017-07-28	Diphenhydramine	2	21.5	0.25	7.88	***												7.71	18
7	2017-07-29	Diphenhydramine	2			7.71	18											0.25	7.89	10
8	2017-07-30	Diphenhydramine	2		0.25	7.89	10										21.7		7.75	15
9	2017-07-31	Diphenhydramine	2	21.7		7.75	15										21.2	0	7.87	16
10	2017-08-01	Diphenhydramine	2	21.2	0	7.87	16										22.2	0	7.9	20
11	2017-08-02	Diphenhydramine	2	22.2	0	7.9	20										21.2		7.86	19.5
12	2017-08-03	Diphenhydramine	2	21.2		7.86	19.5										21.2	0	7.82	19
13	2017-08-04	Diphenhydramine	2	21.2	0	7.82	19										21.5		7.84	19.5
14	2017-08-05	Diphenhydramine	2	21.5		7.84	19.5										21.9	0.1	7.84	19.5
15	2017-08-06	Diphenhydramine	2	21.9	0.1	7.84	19.5										20.9		7.78	20
16	2017-08-07	Diphenhydramine	2	20.9		7.78	20										20.1	0.1	7.88	19.5
17	2017-08-08	Diphenhydramine	2	20.1	0.1	7.88	19.5										20.3		7.81	19
18	2017-08-09	Diphenhydramine	2	20.3		7.81	19										22	0.25	8.06	16
Day	Date	Treatment	Tank #	Temp	NH3	pH	salinity	average (temp)	std dev (temp)	average (NH3)	std dev (NH3)	average (pH)	std dev (pH)	average (salinity)	std dev (salinity)		21.5	0.25	8.3	20
-8	2017-07-14	Diphenhydramine	3	22	0.25	8.06	16	21.332	0.685395	0.214706	0.163712	8.04074	0.15442	18.4038	1.13154		21		8.46	20
-7	2017-07-15	Diphenhydramine	3	21.5	0.25	8.3	20										20.6	0.25	8.11	19.5
-6	2017-07-16	Diphenhydramine	3	21		8.46	20	25		17		27		26		<- n	20.8		8.36	18.5
-5	2017-07-17	Diphenhydramine	3	20.6	0.25	8.11	19.5										21.2	0.5	8	19.5
-4	2017-07-18	Diphenhydramine	3	20.8		8.36	18.5										21.1	0.5	8.21	18
-3	2017-07-19	Diphenhydramine	3	21.2	0.5	8	19.5										21.2	0.3	8.26	17
-2	2017-07-20	Diphenhydramine	3	21.1	0.5	8.21	18										22.1	0.5	8.05	19
-1	2017-07-21	Diphenhydramine	3	21.2	0.3	8.26	17										23.6	0.1	7.96	18.5
0	2017-07-22	Diphenhydramine	3	22.1	0.5	8.05	19										22		8.04	18
1	2017-07-23	Diphenhydramine	3	23.6	0.1	7.96	18.5										21	0.1	7.98	17
2	2017-07-24	Diphenhydramine	3	22		8.04	18										21.1	0.1	7.97	18
3	2017-07-25	Diphenhydramine	3	21	0.1	7.98	17										21.6		7.96	18.5
4	2017-07-26	Diphenhydramine	3	21.1	0.1	7.97	18										21.7	0.25	7.96	***
5	2017-07-27	Diphenhydramine	3	21.6		7.96	18.5												7.87	18
6	2017-07-28	Diphenhydramine	3	21.7	0.25	7.96	***											0.25	7.9	16
7	2017-07-29	Diphenhydramine	3			7.87	18										21.7		7.93	17
8	2017-07-30	Diphenhydramine	3		0.25	7.9	16										21.3	0	8.01	18
9	2017-07-31	Diphenhydramine	3	21.7		7.93	17										21.6	0	7.78	19
10	2017-08-01	Diphenhydramine	3	21.3	0	8.01	18										21.1		7.94	20
11	2017-08-02	Diphenhydramine	3	21.6	0	7.78	19										20.8	0.1	8.01	18
12	2017-08-03	Diphenhydramine	3	21.1		7.94	20										21.3		8.06	19
13	2017-08-04	Diphenhydramine	3	20.8	0.1	8.01	18										21.7	0.1	8.01	19.5
14	2017-08-05	Diphenhydramine	3	21.3		8.06	19										20.7		7.95	19.5
15	2017-08-06	Diphenhydramine	3	21.7	0.1	8.01	19.5										20.2	0.1	8.03	18.5
16	2017-08-07	Diphenhydramine	3	20.7		7.95	19.5										20.4		7.93	18.5
17	2017-08-08	Diphenhydramine	3	20.2	0.1	8.03	18.5
18	2017-08-09	Diphenhydramine	3	20.4		7.93	18.5

## Sheet: EE2 Tanks
Day	Date	Treatment	Tank #	Temp	NH3	pH	salinity	average (temp)	std dev (temp)	average (NH3)	std dev (NH3)	average (pH)	std dev (pH)	average (salinity)	std dev (salinity)		Temp	NH3	pH	salinity	average (temp)	std dev (temp)	average (NH3)	std dev (NH3)	average (pH)	std dev (pH)	average (salinity)	std dev (salinity)
-8	2017-07-14	EE2	1	21.8	0.25	8.18	17	21	0.587367	0.208333	0.184909	7.99667	0.140712	18	0.824621		21.8	0.25	8.18	17	21.1405	0.555402	0.226471	0.18258	7.99617	0.169208	18.3654	1.03093
-7	2017-07-15	EE2	1	21	0.25	8.31	18.5										21	0.25	8.31	18.5	74		51		81		78		<- n
-6	2017-07-16	EE2	1	20.6	0	8.32	18.5	25		18		27		26		<- n	20.6	0	8.32	18.5
-5	2017-07-17	EE2	1	20.4	0.25	8.11	18.5										20.4	0.25	8.11	18.5							n total =	284
-4	2017-07-18	EE2	1	20.4		8.29	17										20.4		8.29	17
-3	2017-07-19	EE2	1	20.6	0.5	7.96	17										20.6	0.5	7.96	17
-2	2017-07-20	EE2	1	21.3	0.5	8.07	18.5										21.3	0.5	8.07	18.5
-1	2017-07-21	EE2	1	21.2	0.5	8.13	18										21.2	0.5	8.13	18
0	2017-07-22	EE2	1	21.5	0.5	8.02	18										21.5	0.5	8.02	18
1	2017-07-23	EE2	1	21.6	0.1	7.88	18										21.6	0.1	7.88	18
2	2017-07-24	EE2	1	21.5		7.97	19.5										21.5		7.97	19.5
3	2017-07-25	EE2	1	20.7	0.1	7.95	18.5										20.7	0.1	7.95	18.5
4	2017-07-26	EE2	1	21.1	0.1	7.95	18										21.1	0.1	7.95	18
5	2017-07-27	EE2	1	21.3		7.98	18										21.3		7.98	18
6	2017-07-28	EE2	1	21.1	0.25	7.91	***										21.1	0.25	7.91	***
7	2017-07-29	EE2	1			7.82	18												7.82	18
8	2017-07-30	EE2	1		0.25	7.99	17											0.25	7.99	17
9	2017-07-31	EE2	1	21.6		7.96	17										21.6		7.96	17
10	2017-08-01	EE2	1	20.8	0	7.96	17										20.8	0	7.96	17
11	2017-08-02	EE2	1	22.5	0	7.87	18										22.5	0	7.87	18
12	2017-08-03	EE2	1	20.5		7.92	18										20.5		7.92	18
13	2017-08-04	EE2	1	20.8	0	7.89	17										20.8	0	7.89	17
14	2017-08-05	EE2	1	21		7.96	18				18	0.824621					21		7.96	18
15	2017-08-06	EE2	1	21.3	0.1	7.91	18				18.5577	1.01318					21.3	0.1	7.91	18
16	2017-08-07	EE2	1	20.4		7.84	20				18.5385	1.16553					20.4		7.84	20
17	2017-08-08	EE2	1	20.1	0.1	7.87	19.5										20.1	0.1	7.87	19.5
18	2017-08-09	EE2	1	19.9		7.89	17.5										19.9		7.89	17.5
Day	Date	Treatment	Tank #	Temp	NH3	pH	salinity	average (temp)	std dev (temp)	average (NH3)	std dev (NH3)	average (pH)	std dev (pH)	average (salinity)	std dev (salinity)		22	0.25	8.01	16
-8	2017-07-14	EE2	2	22	0.25	8.01	16	21.332	0.539846	0.223529	0.18038	8.00111	0.178656	18.5577	1.01318		21.5	0.25	8.39	19.5
-7	2017-07-15	EE2	2	21.5	0.25	8.39	19.5										21		8.42	19.5
-6	2017-07-16	EE2	2	21		8.42	19.5	25		17		27		26		<- n	20.6	0.5	8.11	20
-5	2017-07-17	EE2	2	20.6	0.5	8.11	20										20.9		8.39	19.5
-4	2017-07-18	EE2	2	20.9		8.39	19.5										21	0.5	8.06	19.5
-3	2017-07-19	EE2	2	21	0.5	8.06	19.5										21.1	0.4	8.2	18
-2	2017-07-20	EE2	2	21.1	0.4	8.2	18										21.2	0.4	8.23	18
-1	2017-07-21	EE2	2	21.2	0.4	8.23	18										22.1	0.5	8.03	19.5
0	2017-07-22	EE2	2	22.1	0.5	8.03	19.5										22.1	0.1	7.93	18.5
1	2017-07-23	EE2	2	22.1	0.1	7.93	18.5										22		8.01	18.5
2	2017-07-24	EE2	2	22		8.01	18.5										21	0.1	7.94	18
3	2017-07-25	EE2	2	21	0.1	7.94	18										21.1	0.1	7.93	17
4	2017-07-26	EE2	2	21.1	0.1	7.93	17										21.6		7.96	19
5	2017-07-27	EE2	2	21.6		7.96	19										21.6	0.25	7.91	***
6	2017-07-28	EE2	2	21.6	0.25	7.91	***												7.82	18
7	2017-07-29	EE2	2			7.82	18											0.25	7.98	17
8	2017-07-30	EE2	2		0.25	7.98	17										21.7		7.88	18
9	2017-07-31	EE2	2	21.7		7.88	18										21.2	0	7.95	19
10	2017-08-01	EE2	2	21.2	0	7.95	19										22.2	0	7.89	19
11	2017-08-02	EE2	2	22.2	0	7.89	19										21.1		7.92	19.5
12	2017-08-03	EE2	2	21.1		7.92	19.5										21.1	0	7.85	18
13	2017-08-04	EE2	2	21.1	0	7.85	18										21.5		7.88	18
14	2017-08-05	EE2	2	21.5		7.88	18										22	0.1	7.84	19.5
15	2017-08-06	EE2	2	22	0.1	7.84	19.5										21		7.8	20
16	2017-08-07	EE2	2	21		7.8	20										20.2	0.1	7.87	18.5
17	2017-08-08	EE2	2	20.2	0.1	7.87	18.5										20.5		7.83	17.5
18	2017-08-09	EE2	2	20.5		7.83	17.5										21.4	0.25	8.21	16
Day	Date	Treatment	Tank #	Temp	NH3	pH	salinity	average (temp)	std dev (temp)	average (NH3)	std dev (NH3)	average (pH)	std dev (pH)	average (salinity)	std dev (salinity)		21.1	0.5	8.36	19.5
-8	2017-07-14	EE2	3	21.4	0.25	8.21	16	21.0875	0.500706	0.25	0.191485	7.99074	0.190585	18.5385	1.16553		20.8		8.36	19.5
-7	2017-07-15	EE2	3	21.1	0.5	8.36	19.5										20.3	0.5	8.03	19.5
-6	2017-07-16	EE2	3	20.8		8.36	19.5	24		16		27		26		<- n	20.6		8.42	20
-5	2017-07-17	EE2	3	20.3	0.5	8.03	19.5										20.7	0.25	8.03	18.5
-4	2017-07-18	EE2	3	20.6		8.42	20										21	0.5	8.27	19.5
-3	2017-07-19	EE2	3	20.7	0.25	8.03	18.5										21	0.5	8.26	17.5
-2	2017-07-20	EE2	3	21	0.5	8.27	19.5										21.7	0.5	7.97	18
-1	2017-07-21	EE2	3	21	0.5	8.26	17.5										22.3	0.1	7.91	18.5
0	2017-07-22	EE2	3	21.7	0.5	7.97	18										21.6		7.95	18
1	2017-07-23	EE2	3	22.3	0.1	7.91	18.5										20.8	0.1	7.9	18.5
2	2017-07-24	EE2	3	21.6		7.95	18										21		7.88	16
3	2017-07-25	EE2	3	20.8	0.1	7.9	18.5										21.3		7.86	17.5
4	2017-07-26	EE2	3	21		7.88	16											0.25	7.83	***
5	2017-07-27	EE2	3	21.3		7.86	17.5												7.77	19
6	2017-07-28	EE2	3		0.25	7.83	***											0.25	7.97	17.5
7	2017-07-29	EE2	3			7.77	19										21.8		7.8	19
8	2017-07-30	EE2	3		0.25	7.97	17.5										21	0	7.89	20
9	2017-07-31	EE2	3	21.8		7.8	19										21.4	0	7.86	17
10	2017-08-01	EE2	3	21	0	7.89	20										20.6		7.96	19
11	2017-08-02	EE2	3	21.4	0	7.86	17										20.8	0.1	7.95	19.5
12	2017-08-03	EE2	3	20.6		7.96	19										21.1		7.95	19.5
13	2017-08-04	EE2	3	20.8	0.1	7.95	19.5										21.8	0.1	7.86	19.5
14	2017-08-05	EE2	3	21.1		7.95	19.5										20.8		7.79	19.5
15	2017-08-06	EE2	3	21.8	0.1	7.86	19.5										21	0.1	7.89	19
16	2017-08-07	EE2	3	20.8		7.79	19.5										20.2		7.82	17
17	2017-08-08	EE2	3	21	0.1	7.89	19
18	2017-08-09	EE2	3	20.2		7.82	17

## Sheet: Controls
Day	Date	Treatment	Tank #	Temp	NH3	pH	salinity	average (temp)	std dev (temp)	average (NH3)	std dev (NH3)	average (pH)	std dev (pH)	average (salinity)	std dev (salinity)		Temp	NH3	pH	salinity	average (temp)	std dev (temp)	average (NH3)	std dev (NH3)	average (pH)	std dev (pH)	average (salinity)	std dev (salinity)
-8	2017-07-14	V control	1	22.3	0.25	8.12	16	21.316	0.587849	0.229412	0.17771	7.87333	0.10731	17.3577	2.00563		22.3	0.25	8.12	16	21.0702	0.558887	0.222024	0.166348	7.96269	0.16032	18.2138	1.47089
-7	2017-07-15	V control	1	21.5	0.25	8.02	20										21.5	0.25	8.02	20	124		84		134		130		<- n
-6	2017-07-16	V control	1	21.1		8.08	19	25		17		27		26		<- n	21.1		8.08	19
-5	2017-07-17	V control	1	20.8	0.5	7.96	19										20.8	0.5	7.96	19							n total =	472
-4	2017-07-18	V control	1	20.8		8.03	18.5										20.8		8.03	18.5	max
-3	2017-07-19	V control	1	21.1	0.5	7.91	18.5										21.1	0.5	7.91	18.5	22.5
-2	2017-07-20	V control	1	21.1	0.5	7.94	19.5										21.1	0.5	7.94	19.5	mix
-1	2017-07-21	V control	1	20.8	0.3	7.94	11										20.8	0.3	7.94	11	19.8
0	2017-07-22	V control	1	22	0.5	7.94	15										22	0.5	7.94	15
1	2017-07-23	V control	1	22	0.1	7.85	15.3										22	0.1	7.85	15.3
2	2017-07-24	V control	1	21.7		7.93	17										21.7		7.93	17
3	2017-07-25	V control	1	20.6	0.1	7.86	17.5										20.6	0.1	7.86	17.5
4	2017-07-26	V control	1	20.6	0.1	7.89	17										20.6	0.1	7.89	17
5	2017-07-27	V control	1	21.8		7.82	18										21.8		7.82	18
6	2017-07-28	V control	1	21.3	0.25	7.8	***										21.3	0.25	7.8	***
7	2017-07-29	V control	1			7.66	14												7.66	14
8	2017-07-30	V control	1		0.25	7.78	16											0.25	7.78	16
9	2017-07-31	V control	1	21.8		7.81	16										21.8		7.81	16
10	2017-08-01	V control	1	21	0	7.78	17.5										21	0	7.78	17.5
11	2017-08-02	V control	1	22.5	0	7.84	18										22.5	0	7.84	18
12	2017-08-03	V control	1	21.3		7.83	17										21.3		7.83	17
13	2017-08-04	V control	1	21.4	0.1	7.83	17.5										21.4	0.1	7.83	17.5
14	2017-08-05	V control	1	21.6		7.86	18										21.6		7.86	18
15	2017-08-06	V control	1	21.9	0.1	7.83	19.5										21.9	0.1	7.83	19.5
16	2017-08-07	V control	1	20.8		7.76	18										20.8		7.76	18
17	2017-08-08	V control	1	20.1	0.1	7.77	19.5										20.1	0.1	7.77	19.5
18	2017-08-09	V control	1	21		7.74	19										21		7.74	19
Day	Date	Treatment	Tank #	Temp	NH3	pH	salinity	average (temp)	std dev (temp)	average (NH3)	std dev (NH3)	average (pH)	std dev (pH)	average (salinity)	std dev (salinity)		21.8	0.25	8.01	16
-8	2017-07-14	V control	2	21.8	0.25	8.01	16	20.964	0.578705	0.2125	0.164823	7.9037	0.135339	17.8846	1.29852		21	0.25	8.18	19
-7	2017-07-15	V control	2	21	0.25	8.18	19										20.4		8.21	19
-6	2017-07-16	V control	2	20.4		8.21	19	25		16		27		26		<- n	20.5		8.03	18.5
-5	2017-07-17	V control	2	20.5		8.03	18.5										20.4		8.15	19
-4	2017-07-18	V control	2	20.4		8.15	19										20.6	0.5	7.93	18.5
-3	2017-07-19	V control	2	20.6	0.5	7.93	18.5										21.1	0.4	8.05	18.5
-2	2017-07-20	V control	2	21.1	0.4	8.05	18.5										21.2	0.4	8.07	18
-1	2017-07-21	V control	2	21.2	0.4	8.07	18										21.8	0.5	7.94	17
0	2017-07-22	V control	2	21.8	0.5	7.94	17										22	0.1	7.86	18
1	2017-07-23	V control	2	22	0.1	7.86	18										21.5		7.88	18.5
2	2017-07-24	V control	2	21.5		7.88	18.5										20.6	0.1	7.88	19
3	2017-07-25	V control	2	20.6	0.1	7.88	19										21.1	0.1	7.79	16
4	2017-07-26	V control	2	21.1	0.1	7.79	16										21.3		7.87	16
5	2017-07-27	V control	2	21.3		7.87	16										20.9	0.25	7.74	***
6	2017-07-28	V control	2	20.9	0.25	7.74	***												7.68	16
7	2017-07-29	V control	2			7.68	16											0.25	7.79	17
8	2017-07-30	V control	2		0.25	7.79	17										21.7		7.83	18
9	2017-07-31	V control	2	21.7		7.83	18										20.8	0	7.83	18
10	2017-08-01	V control	2	20.8	0	7.83	18										21.7	0	7.79	20
11	2017-08-02	V control	2	21.7	0	7.79	20										20.5		7.85	20
12	2017-08-03	V control	2	20.5		7.85	20										20.8	0.1	7.85	16
13	2017-08-04	V control	2	20.8	0.1	7.85	16										21		7.88	16
14	2017-08-05	V control	2	21		7.88	16										21.2	0.1	7.85	17
15	2017-08-06	V control	2	21.2	0.1	7.85	17										20.3		7.76	18
16	2017-08-07	V control	2	20.3		7.76	18										20.1	0.1	7.87	18.5
17	2017-08-08	V control	2	20.1	0.1	7.87	18.5										19.8		7.83	19.5
18	2017-08-09	V control	2	19.8		7.83	19.5										21.6	0.25	8.05	17
Day	Date	Treatment	Tank #	Temp	NH3	pH	salinity	average (temp)	std dev (temp)	average (NH3)	std dev (NH3)	average (pH)	std dev (pH)	average (salinity)	std dev (salinity)		21.1	0.25	8.36	19
-8	2017-07-14	V control	3	21.6	0.25	8.05	17	21.032	0.493052	0.208824	0.169775	8.04333	0.139367	18.4231	1.44701		20.6		8.39	19
-7	2017-07-15	V control	3	21.1	0.25	8.36	19										20.5	0.25	8	19
-6	2017-07-16	V control	3	20.6		8.39	19	25		17		27		26		<- n	20.6		8.25	18.5
-5	2017-07-17	V control	3	20.5	0.25	8	19										20.8	0.5	7.91	19
-4	2017-07-18	V control	3	20.6		8.25	18.5										21.1	0.5	8.19	19.5
-3	2017-07-19	V control	3	20.8	0.5	7.91	19										20.9	0.3	8.18	18
-2	2017-07-20	V control	3	21.1	0.5	8.19	19.5										21.8	0.5	7.96	18.5
-1	2017-07-21	V control	3	20.9	0.3	8.18	18										22.1	0.1	7.88	18.5
0	2017-07-22	V control	3	21.8	0.5	7.96	18.5										21.6		7.96	19.5
1	2017-07-23	V control	3	22.1	0.1	7.88	18.5										20.5	0.1	8.07	19
2	2017-07-24	V control	3	21.6		7.96	19.5										21.1	0.1	8.03	18.5
3	2017-07-25	V control	3	20.5	0.1	8.07	19										21.5		8.03	19
4	2017-07-26	V control	3	21.1	0.1	8.03	18.5										21.2	0.25	8.03	***
5	2017-07-27	V control	3	21.5		8.03	19												8.02	19
6	2017-07-28	V control	3	21.2	0.25	8.03	***											0.25	8.13	15.5
7	2017-07-29	V control	3			8.02	19										21.4		8.06	19
8	2017-07-30	V control	3		0.25	8.13	15.5										21.1	0	8.09	19
9	2017-07-31	V control	3	21.4		8.06	19										21.3	0	7.79	20
10	2017-08-01	V control	3	21.1	0	8.09	19										20.7		8.05	20
11	2017-08-02	V control	3	21.3	0	7.79	20										20.8	0	8.01	14
12	2017-08-03	V control	3	20.7		8.05	20										21		8.03	16
13	2017-08-04	V control	3	20.8	0	8.01	14										21.5	0.1	7.97	17
14	2017-08-05	V control	3	21		8.03	16										20.6		7.88	19.5
15	2017-08-06	V control	3	21.5	0.1	7.97	17										20.1	0.1	7.97	20
16	2017-08-07	V control	3	20.6		7.88	19.5										20.3		7.88	18
17	2017-08-08	V control	3	20.1	0.1	7.97	20										22.1	0.25	8.05	17
18	2017-08-09	V control	3	20.3		7.88	18										21.3	0.25	8.25	18
Day	Date	Treatment	Tank #	Temp	NH3	pH	salinity	average (temp)	std dev (temp)	average (NH3)	std dev (NH3)	average (pH)	std dev (pH)	average (salinity)	std dev (salinity)		20.6		8.29	18
-8	2017-07-14	control	3	22.1	0.25	8.05	17	21.02	0.567891	0.258824	0.197037	7.935	0.151796	18.8462	0.902986		20.5	0.25	8.04	19
-7	2017-07-15	control	3	21.3	0.25	8.25	18										20.5		8.21	20
-6	2017-07-16	control	3	20.6		8.29	18	25		17		26		26		<- n	20.8	0.75	7.89	19.5
-5	2017-07-17	control	3	20.5	0.25	8.04	19										21	0.5	8.1	19.5
-4	2017-07-18	control	3	20.5		8.21	20										21	0.5	8.09	18.5
-3	2017-07-19	control	3	20.8	0.75	7.89	19.5										21.8	0.5	7.96	18
-2	2017-07-20	control	3	21	0.5	8.1	19.5										21.8	0.15	7.91	18
-1	2017-07-21	control	3	21	0.5	8.09	18.5										21.6		7.95	18
0	2017-07-22	control	3	21.8	0.5	7.96	18										20.7	0.1	7.93	18
1	2017-07-23	control	3	21.8	0.15	7.91	18										21.1	0.1	7.9	18
2	2017-07-24	control	3	21.6		7.95	18										21.3		7.84	19.5
3	2017-07-25	control	3	20.7	0.1	7.93	18										21.2	0.25	7.85	***
4	2017-07-26	control	3	21.1	0.1	7.9	18												7.75	18
5	2017-07-27	control	3	21.3		7.84	19.5											0.25	7.91	17.5
6	2017-07-28	control	3	21.2	0.25	7.85	***										21.4		7.85	19
7	2017-07-29	control	3			7.75	18										20.9	0.25	7.86	19
8	2017-07-30	control	3		0.25	7.91	17.5										21.8	0		19
9	2017-07-31	control	3	21.4		7.85	19										20.6		7.86	20
10	2017-08-01	control	3	20.9	0.25	7.86	19										20.6	0.1	7.84	20
11	2017-08-02	control	3	21.8	0		19										21		7.89	19.5
12	2017-08-03	control	3	20.6		7.86	20										21.5	0.1	7.84	19.5
13	2017-08-04	control	3	20.6	0.1	7.84	20										20.5		7.76	19.5
14	2017-08-05	control	3	21		7.89	19.5										19.8	0.1	7.71	20
15	2017-08-06	control	3	21.5	0.1	7.84	19.5										20.1		7.78	20
16	2017-08-07	control	3	20.5		7.76	19.5										21.5	0.25	8.08	15.5
17	2017-08-08	control	3	19.8	0.1	7.71	20										20.9	0.25	8.4	17.5
18	2017-08-09	control	3	20.1		7.78	20										20.7		8.41	18
Day	Date	Treatment	Tank #	Temp	NH3	pH	salinity	average (temp)	std dev (temp)	average (NH3)	std dev (NH3)	average (pH)	std dev (pH)	average (salinity)	std dev (salinity)		20.6	0.25	8.08	19.5
-8	2017-07-14	control	3	21.5	0.25	8.08	15.5	21.0167	0.533786	0.2	0.128695	8.05704	0.177196	18.5577	1.04237		20.3		8.53	19.5
-7	2017-07-15	control	3	20.9	0.25	8.4	17.5										20.8	0.25	8.1	18.5
-6	2017-07-16	control	3	20.7		8.41	18	24		17		27		26		<- n	21	0.3	8.31	20
-5	2017-07-17	control	3	20.6	0.25	8.08	19.5										21	0.3	8.31	17.5
-4	2017-07-18	control	3	20.3		8.53	19.5										21.7	0.5	8.01	18.5
-3	2017-07-19	control	3	20.8	0.25	8.1	18.5										22.1	0.3	8	18
-2	2017-07-20	control	3	21	0.3	8.31	20										21.6		8.03	18
-1	2017-07-21	control	3	21	0.3	8.31	17.5										20.8	0.1	7.97	18
0	2017-07-22	control	3	21.7	0.5	8.01	18.5										21.1	0.1	7.98	17
1	2017-07-23	control	3	22.1	0.3	8	18										21.4		7.96	19
2	2017-07-24	control	3	21.6		8.03	18											0.25	7.93	***
3	2017-07-25	control	3	20.8	0.1	7.97	18												7.9	19
4	2017-07-26	control	3	21.1	0.1	7.98	17											0.25	8.07	19
5	2017-07-27	control	3	21.4		7.96	19										21.8		7.86	19
6	2017-07-28	control	3		0.25	7.93	***										21	0	7.97	20
7	2017-07-29	control	3			7.9	19										20.8	0	7.91	18
8	2017-07-30	control	3		0.25	8.07	19										20.9		7.99	18.5
9	2017-07-31	control	3	21.8		7.86	19										20.7	0.1	7.98	18.5
10	2017-08-01	control	3	21	0	7.97	20										21.1		8.02	19
11	2017-08-02	control	3	20.8	0	7.91	18										21.8	0.1	7.89	19
12	2017-08-03	control	3	20.9		7.99	18.5										20.5		7.91	20
13	2017-08-04	control	3	20.7	0.1	7.98	18.5										19.9	0.1	8.02	20
14	2017-08-05	control	3	21.1		8.02	19										20.4		7.92	18
15	2017-08-06	control	3	21.8	0.1	7.89	19
16	2017-08-07	control	3	20.5		7.91	20
17	2017-08-08	control	3	19.9	0.1	8.02	20
18	2017-08-09	control	3	20.4		7.92	18
